# Supplementary material for: Effects of age on noninvasive assessments of vascular function in nonhuman primates: implications for translational drug discovery
Source: PubMed Central journal article supplement (PMC3644259; doi:10.1186/1479-5876-11-101), 2013-04-22

Figure S1

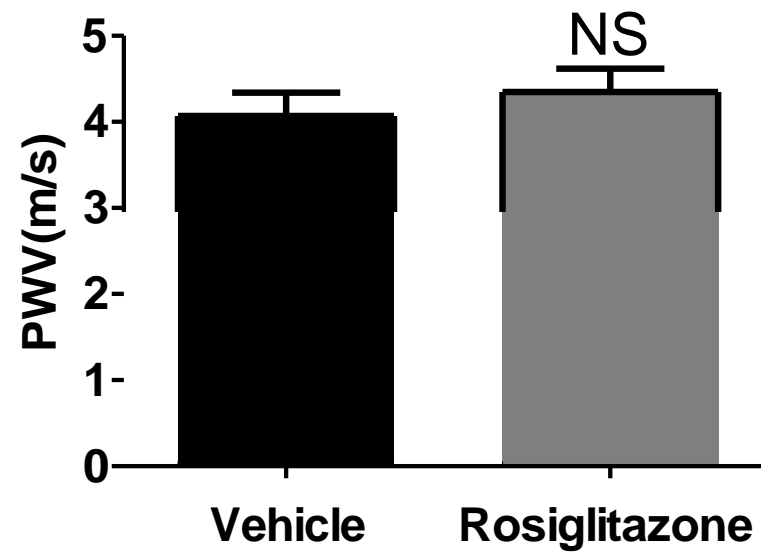

Figure S2

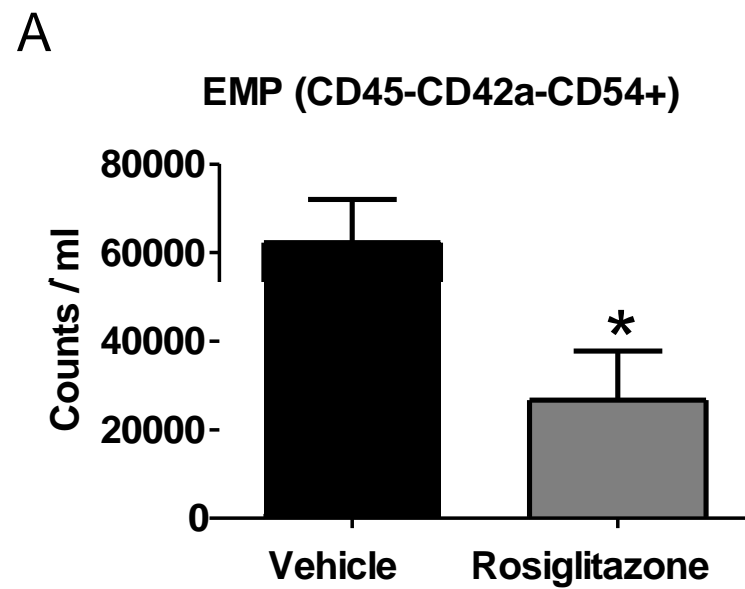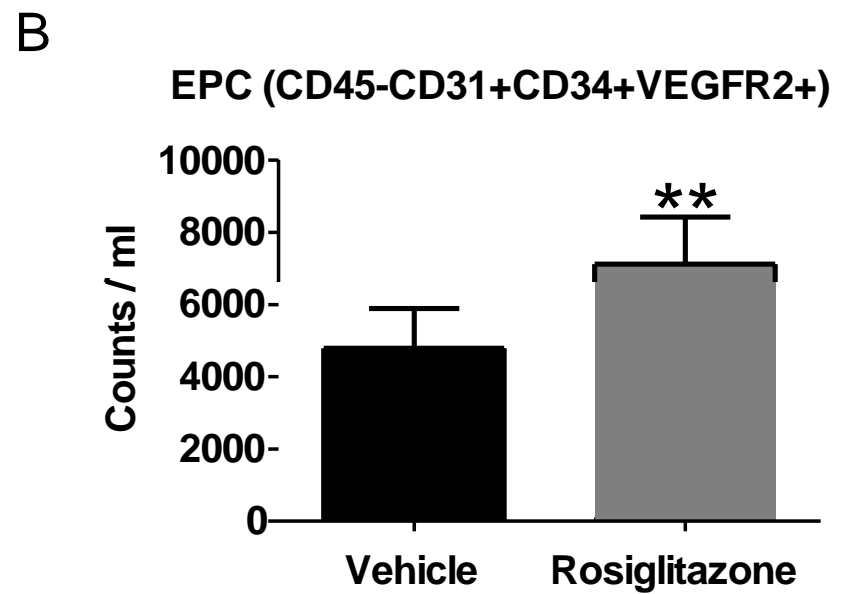

Supplement: 1479-5876-11-101-S3.pdf [file 1479-5876-11-101-S3.pdf]
